# Supplementary material
Source: publisher figshare collection journal article supplement (https://acs.figshare.com/ndownloader/files/20963310)
Supplement: Supplementary file 1 [file 20963310]

## Discovery and characterization of the antimetabolite action of thioacetamide-linked 1,2,3-triazoles as disruptors of cysteine biosynthesis in Gram-negative bacteria

Miranda J. Wallace,<sup>a,b</sup> Suresh Dharuman,<sup>a</sup> Dinesh M. Fernando,<sup>a</sup> Stephanie M. Reeve,<sup>a</sup> Clifford T. Gee,<sup>a</sup> Jiangwei Yao,<sup>c</sup> Elizabeth C. Griffith,<sup>a</sup> Gregory A. Phelps,<sup>a</sup> William C. Wright,<sup>a</sup> John M. Elmore,<sup>a</sup> Robin B. Lee,<sup>a</sup> Taosheng Chen,<sup>a</sup> and Richard E. Lee<sup>a</sup>

|                                                                                                                             |               |
|-----------------------------------------------------------------------------------------------------------------------------|---------------|
| <b>Supplementary Figure 1.</b> Folate biosynthesis metabolite growth inhibition rescue of known antibiotics                 | <b>S2</b>     |
| <b>Supplementary Figure 2.</b> TAT and antifolate synergy plots                                                             | <b>S3</b>     |
| <b>Supplementary Figure 3.</b> Spectroscopic concentration-dependent effects of ligand binding to EcCysK                    | <b>S4</b>     |
| <b>Supplementary Figure 4.</b> LC-MS/MS determination of molecular structure of false product                               | <b>S5</b>     |
| <b>Supplementary Figure 5.</b> Volcano plots of RNA-seq data from <i>E. coli</i> treated with compound 1                    | <b>S6</b>     |
| <b>Supplementary Figure 6.</b> Pathway analysis of transcriptomic changes in M9T relative to M9                             | <b>S7</b>     |
| <b>Supplementary Table 1.</b> Validated hits from <i>E. coli</i> whole cell antimetabolite screen                           | <b>S8</b>     |
| <b>Supplementary Table 2.</b> Susceptibility of <i>E. coli</i> K12 MG1655 to TAT analogs                                    | <b>S9</b>     |
| <b>Supplementary Table 3A.</b> Strains used in this study and growth inhibition by compound 1                               | <b>S10</b>    |
| <b>Supplementary Table 3B.</b> Strains used in this study and growth inhibition by compound 12                              | <b>S10</b>    |
| <b>Supplementary Table 4.</b> Cytotoxicity of lead TATs                                                                     | <b>S11</b>    |
| <b>Supplementary Table 5.</b> Susceptibility of Gram-negative clinical isolates to lead TATs in M9AA-CMS                    | <b>S12</b>    |
| <b>Supplementary Table 6.</b> Location and MIC shift of spontaneous <i>E. coli</i> MG1655 mutants                           | <b>S13</b>    |
| <b>Supplementary Table 7.</b> <i>E. coli</i> BW25113 susceptibilities and metabolite-induced MIC shifts                     | <b>S14</b>    |
| <b>Supplementary Table 8.</b> Susceptibility of the <i>E. coli</i> <i>cysK</i> and <i>cysM</i> knockout strains in M9AA-CMS | <b>S15</b>    |
| <b>Supplementary Table 9.</b> LC-MS/MS detection of compounds 1 and 12                                                      | <b>S16</b>    |
| <b>Supplementary Synthesis and Characterization of compounds 1 - 12</b>                                                     | <b>S17-21</b> |
| <b>Supplementary References</b>                                                                                             | <b>S22</b>    |

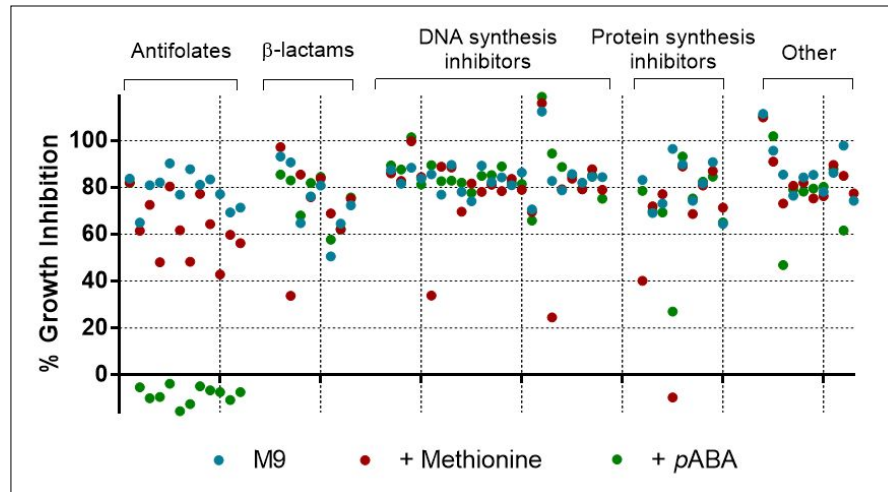

**Supplementary Figure 1. Folate biosynthesis metabolite growth inhibition rescue of known antibiotics.** Blue dots represent % growth inhibition in unsupplemented M9 media. Red dots represent supplementation with 20  $\mu$ g/mL L-methionine and green dots represent supplementation with 5  $\mu$ g/mL pABA.

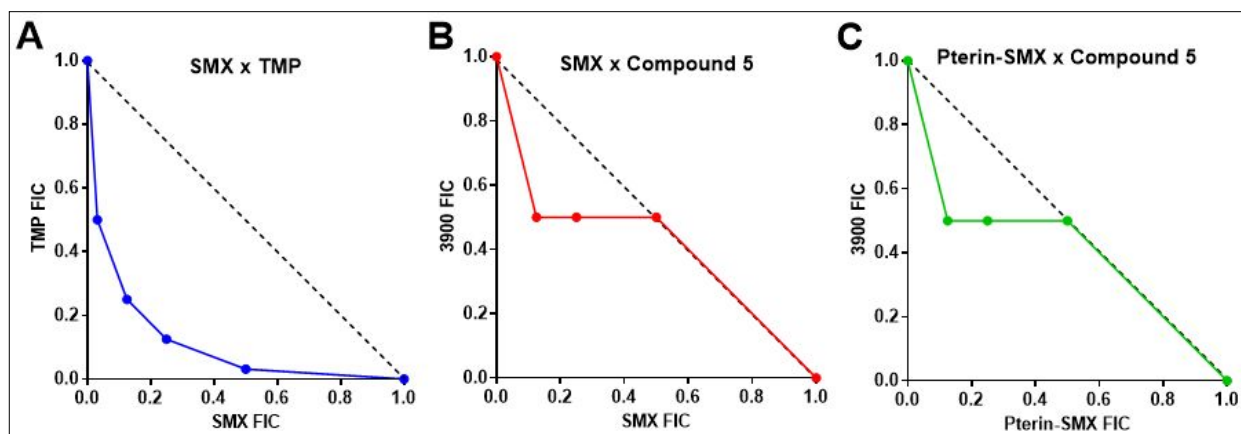

**Supplementary Figure 2. TAT and antifolate synergy plots.** Using checkerboard assays compound 5 potentiates the action of two DHPS inhibitors, sulfamethoxazole and pterin-SMX. SMX = sulfamethoxazole; TMP = trimethoprim; FIC = fractional inhibitory concentration.

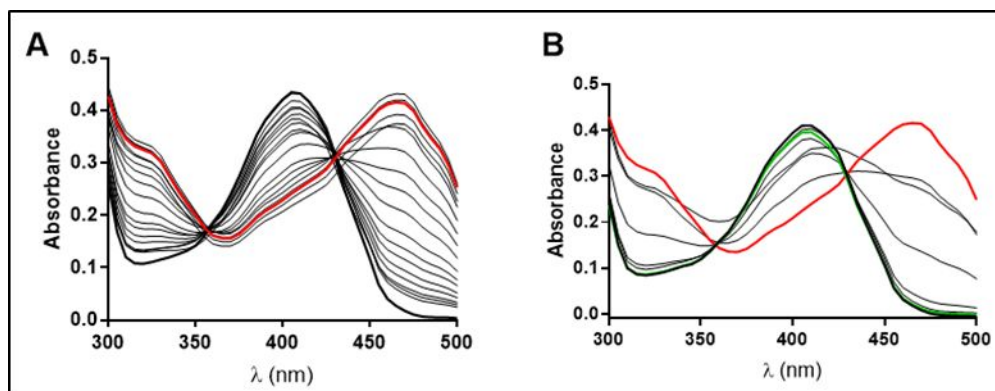

**Supplementary Figure 3. Spectroscopic concentration-dependent effects of ligand binding to EcCysK.** (A) OALS gradient. Apo-EcCysK is represented by a bold black line. Bold red line represents highest concentration of OALS at 1 mM, and other black lines represent intermediate concentrations of OALS. (B) Gradient of compound **1** on OALS-EcCysK complex. Apo-EcCysK is again represented by bold black line, OALS-EcCysK complex with no inhibitor is represented by a red line, a bold green line represents compound **1** and EcCysK without OALS, and all other black lines are intermediate concentrations of compound **1** on the OALS-EcCysK complex.

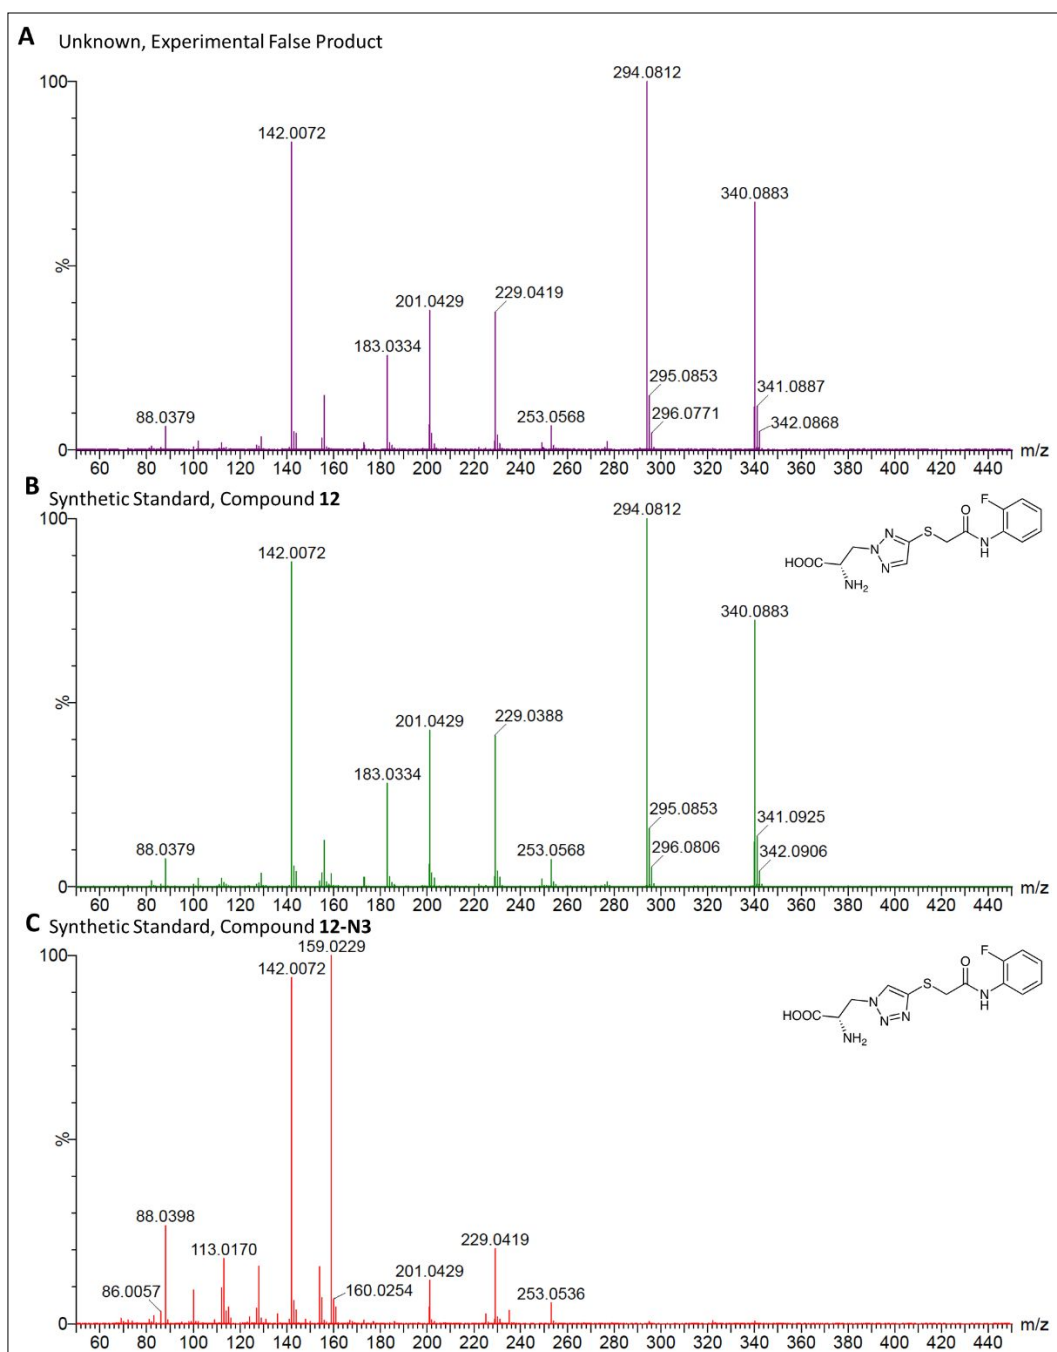

**Supplementary Figure 4. LC-MS/MS determination of molecular structure of false product.** (A) Spectra of compound 1 metabolite from *E. coli* lysate after cell treatment. (B) and (C) are spectra determined from synthetic, analytical standards of two potential isomeric forms of the CysK-mediated false product.

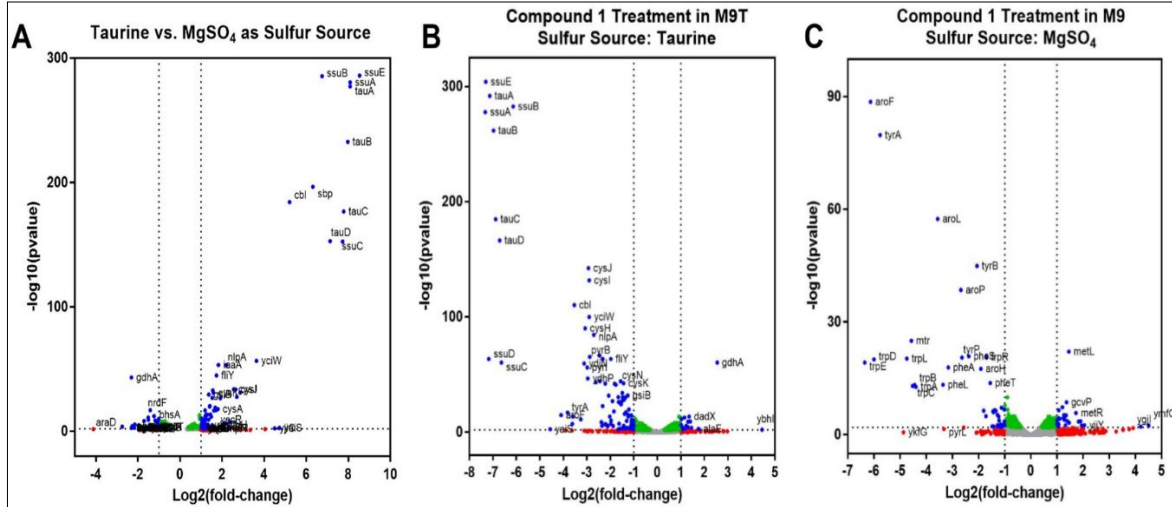

**Supplementary Figure 5. Volcano plots of RNA-seq data from *E. coli* treated with compound 1.** Dashed lines represent cutoffs for significant fold-change of expression at 2 and a P-value of 0.01. Genes with significantly altered transcription and P-values are in blue, genes with significant change in transcription but a P-value of > 0.01 are in red. Green dots represent genes with insignificant changes in transcription in terms of both fold-change and P-value. Grey dots represent genes with a P-value > 0.01 and no significant transcriptional change. Data is shown for (A) *E. coli* global transcriptional response in media environment, (B) treatment with compound 1 in M9T, and (C) treatment with compound 1 in M9.

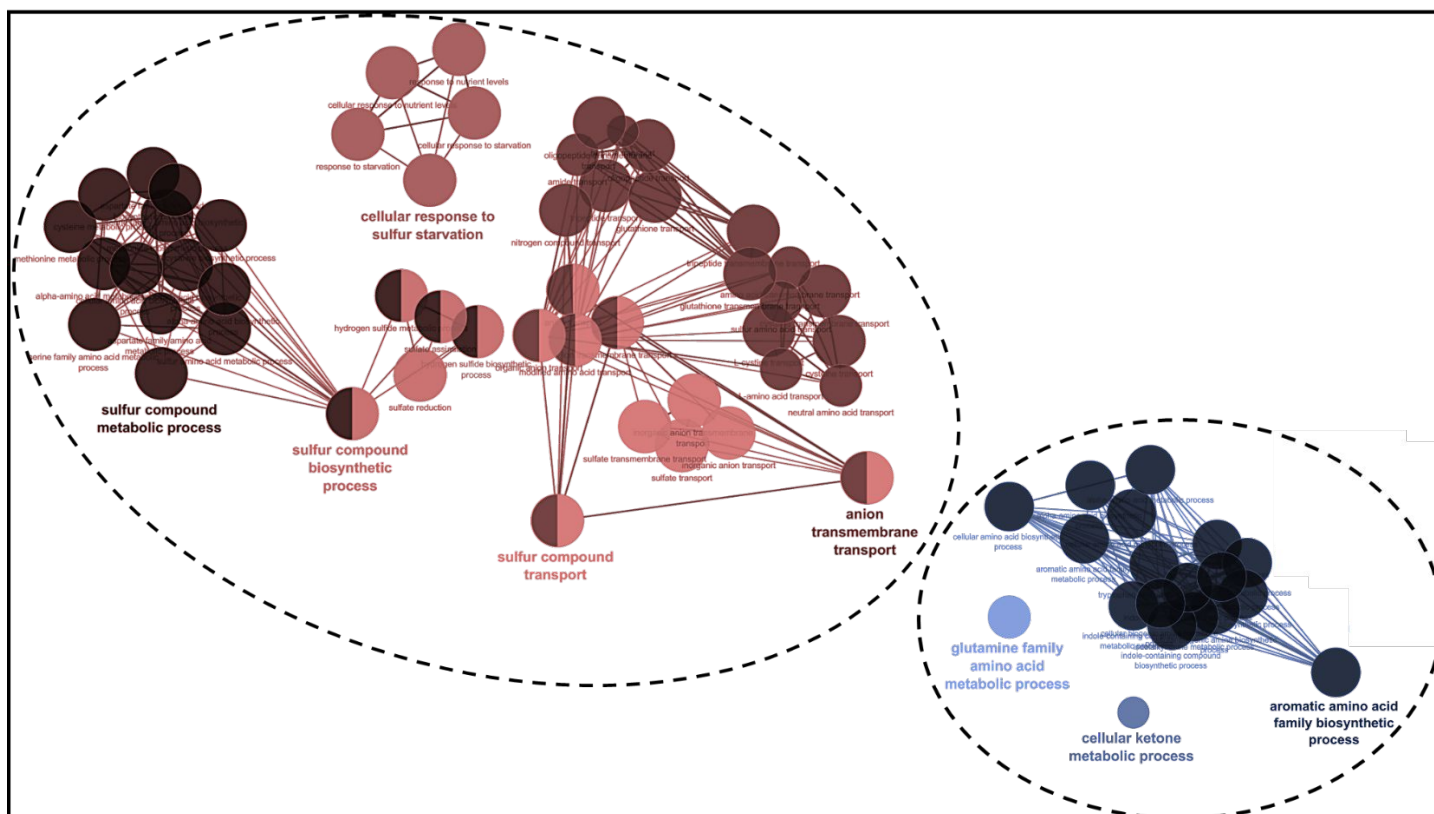

**Supplementary Figure 6. Pathway analysis of transcriptomic changes in M9T relative to M9.** Only genes with at least a 2-fold change in expression and P-value  $\leq 0.01$  were chosen for the pathway analysis. Blue indicates downregulation and red indicates upregulation.

**Supplementary Table 1. Validated hits from *E. coli* whole cell antimetabolite screen**

| Common Name/SJ# <sup>a</sup>             | MIC <sup>b</sup> (μM) | Fold Shift MIC <sup>c</sup> |      | Screening Library | Mechanism of Action                               |
|------------------------------------------|-----------------------|-----------------------------|------|-------------------|---------------------------------------------------|
|                                          |                       | Methionine                  | pABA |                   |                                                   |
| 5-fluorouracil                           | 0.16                  | -                           | -    | Bioactives        | Thymidylate synthase inhibitor                    |
| Floxuridine                              | 0.21                  | 1.3                         | -    | Bioactives        | Thymidylate synthase inhibitor                    |
| Decitabine                               | 0.32                  | 1.6                         | 0.83 | Bioactives        | DNA methyltransferase inhibitor                   |
| Azacytidine                              | 1.6                   | 0.71                        | 0.71 | Lead-Like         | Cytidine analog, treats myelodysplastic syndrome  |
| Zebularine                               | 1.8                   | -                           | 0.75 | Bioactives        | Cytidine analog, epigenetic therapy               |
| Bleomycin                                | 3.1                   | -                           | 0.67 | Bioactives        | Induces DNA strand breaks                         |
| STATTIC                                  | 4.5                   | 2.0                         | -    | Bioactives        | STAT3 inhibitor                                   |
| Pifithrin                                | 6.5                   | 2.0                         | -    | Bioactives        | HSP70 inhibitor                                   |
| Cladribine                               | 8.9                   | 1.7                         | -    | Bioactives        | Purine analog, inhibits adenosine deaminase       |
| SJ000208968 (1)                          | 12.6                  | 4.0                         | -    | Lead-Like         | Unknown                                           |
| Doxifluridine                            | 14.3                  | -                           | 0.88 | Bioactives        | Thymidylate synthase inhibitor                    |
| 5-fluoro-1-(tetrahydro-2-furfuryl)uracil | 18.1                  | 1.3                         | -    | Bioactives        | Thymidylate synthase inhibitor                    |
| SJ000461885                              | 21                    | 4.8                         | -    | Lead-Like         | Unknown                                           |
| SJ000209472 (2)                          | 25                    | 5.3                         | -    | Lead-Like         | Unknown                                           |
| Cisplatin                                | 42                    | 2.4                         | -    | Bioactives        | Inhibits DNA replication, crosslinks purine bases |
| SJ000866485                              | 44                    | -                           | -    | Small Fragment    | Unknown                                           |
| SJ000208489 (3)                          | 50                    | 5.3                         | -    | Lead-Like         | Unknown                                           |
| SJ000129420                              | 50                    | 3.3                         | 1.7  | Lead-Like         | Unknown                                           |
| Chloramphenicol                          | 5.0                   | 1.3                         | -    | NA                | Control antibiotic                                |
| Sulfamethoxazole                         | 0.39                  | 2.0                         | 849  | NA                | Control antibiotic                                |
| Trimethoprim                             | 0.69                  | -                           | -    | NA                | Control antibiotic                                |

<sup>a</sup>Numbers designated in this study for the three selected hits **1-3** are noted in parenthesis.

<sup>b</sup>MIC values and MIC shifts are an average of three independent experiments.

<sup>c</sup>Fold shift MIC is the ratio of supplemented MIC over unsupplemented MIC. L-methionine was supplemented at a final concentration of 20 μg/mL. pABA was supplemented at a final concentration of 5 μg/mL.



**Supplementary Table 2. Susceptibility of *E. coli* K12 MG1655 to TAT analogs**

| <b>Cpd. #</b>          | <b>SMILE</b>                                              | <b><i>E. coli</i> K12 MG1655<br/>MIC in M9<sup>a</sup> (μg/mL)</b> |
|------------------------|-----------------------------------------------------------|--------------------------------------------------------------------|
| <b>1</b>               | <chem>Fc1cccc1NC(=O)CSc1c[nH]nn1</chem>                   | 1.6                                                                |
| <b>2</b>               | <chem>Fc1ccc(NC(=O)CSc2c[nH]nn2)cc1</chem>                | 3.1                                                                |
| <b>3</b>               | <chem>O=C(CSc1c[nH]nn1)Nc1cccc1C#N</chem>                 | 3.1                                                                |
| <b>4</b>               | <chem>FC1=CC=CC(NCCSC2=CN=NN2)=C1</chem>                  | 1.6                                                                |
| <b>5</b>               | <chem>O=C(CSC1=CN=NN1)NC1=NC=CS1</chem>                   | 1.6                                                                |
| <b>6</b>               | <chem>O=C(CSC1=CN=NN1)NC1=CC=CC=N1</chem>                 | 1.6                                                                |
| <b>7</b>               | <chem>CN1N=NC=C1SCC(=O)NC1=CC=CC=C1</chem>                | >200                                                               |
| <b>8</b>               | <chem>O=C(CSC1=NN=CN1)NC2=CC=CC=C2</chem>                 | 12.5                                                               |
| <b>9</b>               | <chem>FC1=C(NCCSC2=CN=NN2)C=CC=C1</chem>                  | 12.5                                                               |
| <b>10</b>              | <chem>O=C(COC1=NNC=N1)NC1=CC=CC=C1</chem>                 | >200                                                               |
| <b>11</b>              | <chem>O=C(CNC1=NNC=N1)NC1=CC=CC=C1</chem>                 | >200                                                               |
| <b>12</b>              | <chem>N[C@H](CN1N=NC=C1SCC(=O)NC1=CC=CC=C1F)C(O)=O</chem> | >200                                                               |
| <b>CAM<sup>b</sup></b> |                                                           | 1.6                                                                |
| <b>SMX</b>             |                                                           | 0.98                                                               |
| <b>TMP</b>             |                                                           | 0.98                                                               |

<sup>a</sup>Data represent an average of three independent experiments.

<sup>b</sup>CAM = Chloramphenicol; SMX = Sulfamethoxazole; TMP = Trimethoprim.

**Supplementary Table 3A. Strains used in this study and growth inhibition by compound 1**

| Organism                                                   | Characteristic/Genotype                                                           | MIC Media             | MIC of Cpd. 1 (µg/mL) |
|------------------------------------------------------------|-----------------------------------------------------------------------------------|-----------------------|-----------------------|
| <i>E. coli</i>                                             | K12 MG1655                                                                        | M9                    | 1.6                   |
| <i>E. coli</i>                                             | BW25113                                                                           | M9                    | 1.6                   |
| <i>E. coli</i>                                             | BW25113                                                                           | M9AA-CMS <sup>a</sup> | 3.1                   |
| <i>E. coli</i> Δ <i>cysK</i>                               | JW2407, Kan <sup>R</sup>                                                          | M9AA-CMS              | 50                    |
| <i>E. coli</i> Δ <i>cysM</i>                               | JW2414, Kan <sup>R</sup>                                                          | M9AA-CMS              | 1.6                   |
| <i>E. coli</i> pPJ131                                      | BW25113, pPJ131 empty plasmid, CBN <sup>R</sup>                                   | M9AA-CMS              | 1.6                   |
| <i>E. coli</i> : <i>cysK</i>                               | BW25113, pPJ131: <i>cysK</i> , CBN <sup>R</sup>                                   | M9AA-CMS              | 1.6                   |
| <i>E. coli</i> Δ <i>cysK</i> pPJ131                        | JW2407, pPJ131 empty plasmid, KAN <sup>R</sup> , CBN <sup>R</sup>                 | ND                    | ND                    |
| <i>E. coli</i> Δ <i>cysK</i> : <i>cysK</i>                 | JW2407, pPJ131: <i>cysK</i> , Kan <sup>R</sup> , CBN <sup>R</sup>                 | M9AA-CMS              | 0.78                  |
| <i>E. coli</i> Δ <i>cysK</i> : <i>cysK</i> <sup>S70C</sup> | JW2407, pPJ131: <i>cysK</i> <sup>S70C</sup> , Kan <sup>R</sup> , CBN <sup>R</sup> | M9AA-CMS              | >100                  |
| <i>E. cloacae</i>                                          | ATCC 13047                                                                        | M9AA-CMS              | 5.0                   |
| <i>K. pneumoniae</i>                                       | ATCC 700603                                                                       | M9AA-CMS              | 25                    |
| <i>A. baumannii</i>                                        | ATCC 19606                                                                        | M9AA-CMS              | 50                    |
| <i>P. aeruginosa</i>                                       | PAO1                                                                              | M9                    | 200                   |
| <i>S. aureus</i>                                           | ATCC 29213                                                                        | SSM9PR                | >200                  |
| <i>E. faecalis</i>                                         | ATCC 33186                                                                        | Mueller Hinton II     | >200                  |
| <i>M. tuberculosis</i>                                     | H37Rv                                                                             | Sautons               | >200                  |

<sup>a</sup>M9AA-CMS is supplemented with all amino acids except for cysteine, serine, and methionine. Amino acids were supplemented at concentrations listed in Zlitni *et al.*<sup>1</sup> ND: Not determined.

**Supplementary Table 3B. Strains used in this study and growth inhibition by compound 12**

| Organism       | Characteristic/Genotype                                               | MIC Media             | MIC of Cpd. 12 (µg/mL) |
|----------------|-----------------------------------------------------------------------|-----------------------|------------------------|
| <i>E. coli</i> | BW25113                                                               | M9                    | >200                   |
| <i>E. coli</i> | BW25113                                                               | M9 +25uM PAβN         | >200                   |
| <i>E. coli</i> | BW25113                                                               | M9 +0.1ug/mL colistin | >200                   |
| <i>E. coli</i> | GKCW102, BW25113, <i>araC</i>                                         | M9 +0.1% arabinose    | >200                   |
|                | P <sub>araBAD</sub> <i>fhuA</i> Δ <i>C</i> / Δ <i>4L</i> <sup>2</sup> |                       |                        |

**Supplementary Table 4. Cytotoxicity of lead TATs (IC<sub>50</sub>,  $\mu$ M)**

|                       | <b>Vero</b>    | <b>HepG2</b>     |
|-----------------------|----------------|------------------|
| <b>1</b>              | >200           | >200             |
| <b>2</b>              | >200           | >200             |
| <b>3</b>              | >200           | >200             |
| <b>5</b>              | >200           | >200             |
| <b>Nitrofurantoin</b> | 15.2 $\pm$ 0.3 | 5.9 $\pm$ 0.3    |
| <b>Verapamil</b>      | 54.8 $\pm$ 1.3 | 109.4 $\pm$ 56.9 |
| <b>Thioridazine</b>   | 6.1 $\pm$ 0.9  | 5.6 $\pm$ 1.7    |
| <b>Saponin</b>        | 11.6 $\pm$ 0.6 | 7.8 $\pm$ 0.8    |

Vero and HepG2 IC<sub>50</sub> values are an average of two technical replicates  $\pm$ standard deviation.

**Supplementary Table 5. Susceptibility of Gram-negative clinical isolates to lead TATs in M9AA-CMS.**

| Isolate              | MIC (µg/µL) <sup>a</sup> |       |      |      |      |      |      |
|----------------------|--------------------------|-------|------|------|------|------|------|
|                      | AMK <sup>b</sup>         | SMX   | TMP  | 1    | 4    | 5    | 6    |
| <i>E. coli</i>       |                          |       |      |      |      |      |      |
| BW25113              | 1.0                      | 0.098 | 0.31 | 1.6  | 1.6  | 1.0  | 1.2  |
| EcCI 1               | 6.3                      | >25   | >25  | 1.6  | 1.3  | 1.6  | 1.3  |
| EcCI 2               | 5.2                      | 0.39  | 0.49 | 3.5  | 2.0  | 3.5  | 1.6  |
| EcCI 3               | 3.1                      | 0.78  | >25  | 2.7  | 2.7  | 3.1  | 3.1  |
| EcCI 4               | 3.1                      | >25   | >25  | 1.3  | 1.0  | 1.6  | 1.3  |
| EcCI 5               | 3.1                      | >25   | >25  | 3.1  | 2.6  | 3.1  | 2.6  |
| EcCI 6               | 9.4                      | >25   | >25  | 1.6  | 1.6  | 1.6  | 1.6  |
| <i>K. pneumoniae</i> |                          |       |      |      |      |      |      |
| ATCC 700603          | 0.78                     | >25   | 3.1  | 33.3 | 25   | 50   | 25   |
| KpCI 1               | 1.6                      | 0.78  | 0.68 | 15.6 | 12.5 | 25   | 12.5 |
| KpCI 2               | 5.2                      | >25   | >25  | >100 | >100 | >100 | >100 |
| KpCI 3               | 1.6                      | >25   | >25  | 12.5 | 12.5 | 25   | 12.5 |
| KpCI 4               | 1.0                      | 0.65  | 0.78 | 12.5 | 12.5 | 25   | 12.5 |
| KpCI 5               | 0.78                     | >25   | >25  | 20.8 | 16.7 | 25   | 16.7 |
| KpCI 6               | 1.0                      | >25   | >25  | 25   | 25   | 41.7 | 12.5 |

<sup>a</sup>MICs are an average of at least three independent experiments.

<sup>b</sup>AMK = amikacin; SMX = sulfamethoxazole; TMP = trimethoprim; EcCI = *E. coli* clinical isolate; KpCI = *K. pneumoniae* clinical isolate.

**Supplementary Table 6. Location and MIC shifts of spontaneous *E. coli* MG1655 mutants**

|           | <b>CysK Mutation</b> | <b>1</b> | <b>2</b> | <b>3</b> | <b>SMX</b> | <b>TMP</b> | <b>CAM</b> | <b>KAN</b> |
|-----------|----------------------|----------|----------|----------|------------|------------|------------|------------|
| <b>1a</b> | None                 | >64      | >64      | >64      | 1          | 2          | 1          | 2          |
| <b>1b</b> | G71R                 | >64      | >64      | >64      | 1          | 1          | 0.5        | 1          |
| <b>2a</b> | S70C                 | >64      | >64      | 64       | 1          | 1          | 1          | 1          |
| <b>2b</b> | S70C                 | >64      | >64      | 64       | 1          | 1          | 1          | 2          |
| <b>2c</b> | R305S                | >64      | >64      | 64       | 1          | 2          | 1          | 2          |
| <b>2d</b> | P37H                 | >64      | >64      | 64       | 1          | 1          | 0.5        | 1          |
| <b>2e</b> | R44G                 | 64       | 64       | 64       | 1          | 2          | 1          | 2          |
| <b>3a</b> | R305S                | >64      | >64      | 64       | 1          | 1          | 1          | 1          |
| <b>3b</b> | R305S                | >64      | >64      | 64       | 1          | 2          | 1          | 1          |
| <b>3c</b> | R305L                | >64      | >64      | 64       | 1          | 1          | 0.5        | 1          |
| <b>3d</b> | S70C                 | >64      | >64      | >64      | 1          | 1          | 1          | 1          |
| <b>3e</b> | Y306F                | >64      | >64      | 64       | 1          | 1          | 1          | 2          |

<sup>a</sup>Each selected mutant named alphabetically relative to the compound (**1-3**) it was raised against.

<sup>b</sup>MIC shift of each mutant relative to WT MIC. MICs were determined at 24 hours of incubation at 37°C.

Notes: SMX: sulfamethoxazole, TMP: trimethoprim, CAM: chloramphenicol, KAN: kanamycin.

**Supplementary Table 7. *E. coli* BW25113 susceptibilities and metabolite-induced MIC shifts**

| Cpd.               | $\mu\text{g/mL}$<br>MIC | <i>E. coli</i> BW25113 MIC Shift <sup>a</sup> |               |       |       |      |                   |                     |      |
|--------------------|-------------------------|-----------------------------------------------|---------------|-------|-------|------|-------------------|---------------------|------|
|                    |                         | L-Cys <sup>b</sup>                            | L-Glutathione | L-Met | L-Ser | OALS | Na <sub>2</sub> S | AA-CMS <sup>c</sup> | pABA |
| <b>1</b>           | 0.78                    | >256                                          | 128           | 2     | 128   | 128  | 8                 | 2                   | 2    |
| 1,2,4-triazole     | 50                      | 64                                            | 32            | 4     | 64    | 64   | 4                 | 2                   | 2    |
| EcP10 <sup>d</sup> | >200                    | NT                                            | NT            | NT    | NT    | NT   | NT                | NT                  | NT   |
| SMX                | 0.10                    | 0.5                                           | 2             | 8     | 2     | 2    | 2                 | 2                   | >256 |
| TMP                | 0.39                    | 0.5                                           | 1             | 1     | 0.5   | 0.5  | 1                 | 2                   | 1    |
| AMP                | 0.78                    | 2                                             | 1.5           | 2     | 1     | 1    | 2                 | 2                   | 1    |

Notes: SMX = sulfamethoxazole; TMP = trimethoprim; AMP = ampicillin; NT = not tested.

<sup>a</sup>MIC shift is the ratio of averaged MICs from two experiments in supplemented M9 over unsupplemented M9. Dashes represent the absence of a shift of 2-fold or higher.

<sup>b</sup>L-Glutathione was supplemented at 10  $\mu\text{g/mL}$  and Na<sub>2</sub>S•9H<sub>2</sub>O was supplemented at 72  $\mu\text{g/mL}$ . All other metabolites supplemented at concentrations previously specified.<sup>1</sup>

<sup>c</sup>AA-CMS is all twenty standard amino acids with the exception of cysteine, methionine, and serine. Amino acids are again supplemented at concentrations previously specified.<sup>1</sup>

<sup>d</sup>EcP10 is a peptide comprised of the last ten residues on the C-terminal tail of *E. coli* serine acetyltransferase (NHTFEYGDGI).

**Supplementary Table 8. Susceptibility of the *E. coli* *cysK* and *cysM* knockout strains in M9AA-CMS.**

| Drug/Cpd.#       | MIC (µg/mL) |               |               | $\Delta$ cysK fold decrease in MIC <sup>a</sup> |
|------------------|-------------|---------------|---------------|-------------------------------------------------|
|                  | WT          | $\Delta$ cysM | $\Delta$ cysK |                                                 |
| Ampicillin       | 0.78        | 0.78          | 0.78          | 1                                               |
| <b>1</b>         | 3.1         | 3.1           | 50            | 0.063                                           |
| Sulfamethoxazole | 0.098       | 0.098         | 0.024         | 4                                               |
| Pterin-SMX       | 3.1         | 3.1           | 0.78          | 4                                               |
| Trimethoprim     | 0.39        | 0.78          | 0.049         | 8                                               |
| Tetracycline     | 0.78        | 1.6           | 0.39          | 2                                               |
| Chloramphenicol  | 3.1         | 3.1           | 0.78          | 4                                               |

<sup>a</sup>Fold decrease in MIC represents the ratio of the  $\Delta$ cysK MIC over the BW25113 MIC.

**Supplementary Table 9. LC-MS/MS detection of compounds **1** and **12** ( $\mu\text{M}^{\text{a}}$ )**

|                       | <i>In vivo</i> <sup>b</sup>   |                               | <i>In vitro</i> <sup>c</sup>  |                               |
|-----------------------|-------------------------------|-------------------------------|-------------------------------|-------------------------------|
|                       | <b>1</b>                      | <b>12</b>                     | <b>1</b>                      | <b>12</b>                     |
| Replicate 1           | 103.7                         | 169.6                         | 521.0                         | 392.9                         |
| Replicate 2           | 132.5                         | 198.5                         | 499.7                         | 431.2                         |
| Replicate 3           | 98.9                          | 217.4                         | 483.8                         | 389.7                         |
| Average $\pm$ Std dev | <b>112 <math>\pm</math>18</b> | <b>195 <math>\pm</math>24</b> | <b>501 <math>\pm</math>18</b> | <b>404 <math>\pm</math>20</b> |

<sup>a</sup>Experimental samples were quantified by standard curve of pure compound **1**,  $R^2 = 0.9926$  and the false product **12**  $R^2 = 0.9979$  <sup>b</sup>*In vivo* experiments were treated with 0.5mM compound **1** <sup>c</sup>*In vitro* experiments were treated with 1mM compound **1**.



## Supplementary Synthesis and characterization of compounds 1 - 12:

**General experimental procedure:** All solvents used for chromatography and liquid chromatography were purchased from Aldrich. Flash column chromatography silica cartridges were obtained from Biotage Inc. Reactions were monitored by thin-layer chromatography (TLC) on pre-coated Merck 60 F254 silica gel plates and visualized using UV light (254 nm). A Biotage FLASH column chromatography system was used to purify mixtures. <sup>1</sup>H NMR spectra were recorded on a Varian INOVA-500 spectrometer or on a Bruker 400 MHz NMR spectrometer. Chemical shifts ( $\delta$ ) are reported in parts per million relative to the residual solvent peak or internal standard (tetramethylsilane), and coupling constants ( $J$ ) are reported in hertz (Hz). Purity of the products was confirmed by UPLC/MS (the Waters Acquity).

### Scheme 1: General method for the synthesis of compounds 1 - 11

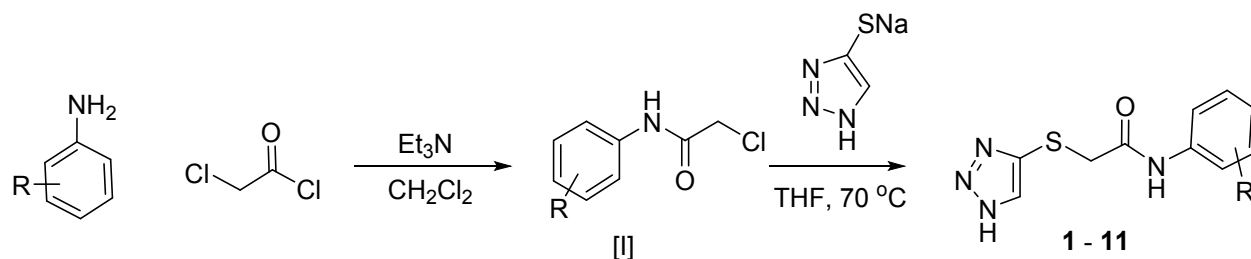

**General procedure A:** To a stirred solution of substituted amine (5.37 mmol) in CH<sub>2</sub>Cl<sub>2</sub> (7.0 mL) was added triethylamine (5.37 mmol) and chloroacetyl chloride<sup>3</sup> (5.37 mmol) at 0 °C. After stirring the reaction mixture for 1h, diluted with CH<sub>2</sub>Cl<sub>2</sub> (20 mL), washed with NaHCO<sub>3</sub>, organic layer was dried over Na<sub>2</sub>SO<sub>4</sub>, and concentrated under high vacuum to give crude chloroacetyl derivative [I]. To a crude chloroacetyl derivative (2.65 mmol) in THF (6.0 mL) was added sodium 1H-1,2,3-triazole-5-thiolate (2.65 mmol) and heated at 70 °C for 1h. The solids were filtered off and the filtrate was evaporated under high vacuum to give crude product. The crude product was purified over silica-gel column chromatography (Eluents: 20 – 50% EtOAc in hexane) to produce pure compound.

**2-((1H-1,2,3-triazol-4-yl)thio)-N-(2-fluorophenyl)acetamide (1):** Compound 1 (400 mg, 76%) was synthesized by following general procedure A, as a white solid. <sup>1</sup>H NMR (500 MHz, D<sub>2</sub>O)  $\delta$  8.08 (s, 1H), 7.67 (td,  $J$  = 8.0, 1.9 Hz, 1H), 7.35 – 7.30 (m, 3H), 3.86 (s, 2H); <sup>13</sup>C NMR (125 MHz, CD<sub>3</sub>OD)  $\delta$  38.2, 115.0 (d,  $J$  = 19.8 Hz), 124.2 – 123.6 (m), 125.5 (d,  $J$  = 11.3 Hz), 125.7 (d,  $J$  = 7.6 Hz), 154.2 (d,  $J$  = 245.6 Hz), 168.5.

**2-((1H-1,2,3-triazol-4-yl)thio)-N-(4-fluorophenyl)acetamide (2):** Compound **2** (350 mg, 32%) was synthesized by following general procedure A, as a white solid. <sup>1</sup>H NMR (500 MHz, CD<sub>3</sub>OD) δ 7.87 (s, 1H), 7.67 – 7.33 (m, 2H), 7.04 (tt, *J* = 8.7, 1.2 Hz, 2H), 3.71 (s, 2H); <sup>13</sup>C NMR (125 MHz, CD<sub>3</sub>OD) δ 38.6, 114.8, 115.0, 121.7, 121.8, 134.3, 134.3, 158.5, 160.4, 168.0.

**2-((1H-1,2,3-triazol-4-yl)thio)-N-(2-cyanophenyl)acetamide (3):** Compound **3** (160 mg, 38%) was synthesized by following general procedure A, as a white solid. <sup>1</sup>H NMR (500 MHz, CD<sub>3</sub>OD) δ 7.93 (s, 1H), 7.70 (d, *J* = 8.2 Hz, 1H), 7.66 (dd, *J* = 7.8, 1.5 Hz, 1H), 7.60 (td, *J* = 8.0, 1.6 Hz, 1H), 7.35 – 7.23 (m, 1H), 3.83 (s, 2H). <sup>13</sup>C NMR (125 MHz, CD<sub>3</sub>OD) δ 38.2, 106.9, 116.1, 124.7, 125.8, 132.9, 133.5, 139.5, 168.7, 171.7.

**2-((1H-1,2,3-triazol-4-yl)thio)-N-phenylacetamide (4):** Compound **4** (500 mg, 70%) was synthesized by following general procedure A, as a white solid. <sup>1</sup>H NMR (500 MHz, CD<sub>3</sub>OD) δ 7.86 (s, 1H), 7.61 – 7.44 (m, 2H), 7.29 (tt, *J* = 8.5, 1.9 Hz, 2H), 7.21 – 7.01 (m, 1H), 3.71 (s, 2H); <sup>13</sup>C NMR (125 MHz, CD<sub>3</sub>OD) δ 38.7, 119.9, 119.9, 120.0, 124.1, 128.4, 131.2, 138.0, 138.1, 168.1.

**2-((1H-1,2,3-triazol-4-yl)thio)-N-(thiazol-2-yl)acetamide (5):** Compound **5** (350 mg, 55%) was synthesized by following general procedure A, as a white solid. <sup>1</sup>H NMR (500 MHz, D<sub>2</sub>O) δ 8.01 (s, 1H), 7.46 (d, *J* = 3.6 Hz, 1H), 7.21 (d, *J* = 3.7 Hz, 1H), 3.82 (s, 2H); <sup>13</sup>C NMR (125 MHz, CD<sub>3</sub>OD) δ 38.0, 114.2, 135.0, 138.2, 158.2, 167.3.

**2-((1H-1,2,3-triazol-4-yl)thio)-N-(pyridin-2-yl)acetamide (6):** Compound **6** (405mg, 49%) was synthesized by following general procedure A, as a white solid. <sup>1</sup>H NMR (500 MHz, CD<sub>3</sub>OD) δ 7.86 (s, 1H), 7.56 – 7.38 (m, 2H), 7.03 (td, *J* = 9.1, 2.1 Hz, 2H), 3.70 (s, 2H); <sup>13</sup>C NMR (125 MHz, CD<sub>3</sub>OD) δ 38.6, 114.8, 115.0, 121.8, 121.8, 134.3, 134.3, 158.5, 160.4, 168.0.

**2-((1-methyl-1H-1,2,3-triazol-5-yl)thio)-N-phenylacetamide (7) and 2-((1-methyl-1H-1,2,3-triazol-4-yl)thio)-N-phenylacetamide (7-N1):**

To a stirred solution of **4** (100 mg, 0.43 mmol) in acetonitrile (3.0 mL) was added Cs<sub>2</sub>CO<sub>3</sub> (139 mg, 0.43 mmol) and iodomethane (0.029 mL, 0.43 mmol) and stirred at room temperature for 2 h. Quenched with water (5.0 mL), extracted with EtOAc (2 X 10 mL), combined organic layer was dried over Na<sub>2</sub>SO<sub>4</sub>, and concentrated under high vacuum to give crude product. Chromatographic (eluents: 40% EtOAc in hexane) purification on silica-gel yielded compound **7** (30 mg, 26%) and **7-N1** (35 mg, 33%) as a white solid. Regio chemistry of methyl group is confirmed by HMBC correlation study.

**7:** <sup>1</sup>H NMR (500 MHz, CD<sub>3</sub>OD) δ 7.64 (s, 1H), 7.50 (d, *J* = 8.0 Hz, 2H), 7.30 (t, *J* = 7.9 Hz, 2H), 7.10 (t, *J* = 7.4 Hz, 1H), 4.11 (s, 3H), 3.72 (s, 2H); <sup>13</sup>C NMR (125 MHz, CD<sub>3</sub>OD) δ 38.3, 40.8, 119.9, 124.1, 128.5, 135.9, 138.1, 140.1, 168.0.

**7-N1:** <sup>1</sup>H NMR (500 MHz, CD<sub>3</sub>OD) δ 7.99 (s, 1H), 7.50 (d, *J* = 8.0 Hz, 2H), 7.29 (t, *J* = 7.8 Hz, 2H), 7.09 (t, *J* = 7.4 Hz, 1H), 4.05 (s, 3H), 3.66 (s, 2H); <sup>13</sup>C NMR (125 MHz, CD<sub>3</sub>OD) δ 35.9, 39.1, 119.8, 124.1, 128.3, 128.4, 138.1, 138.3, 168.1.

**2-((1H-1,2,4-triazol-3-yl)thio)-N-phenylacetamide (8):** Compound **8** (90 mg, 65%) was synthesized by following general procedure A using 1H-1,2,4-triazol-3-ol, as a white solid. <sup>1</sup>H NMR (500 MHz, CD<sub>3</sub>OD) δ 8.36 (s, 1H), 7.52 (d, *J* = 8.1 Hz, 2H), 7.27 (t, *J* = 7.8 Hz, 2H), 7.07 (t, *J* = 7.5 Hz, 1H), 3.99 (s, 2H); <sup>13</sup>C NMR (125 MHz, CD<sub>3</sub>OD) δ 36.1, 119.8, 124.1, 128.5, 138.2, 145.8, 167.7.

**N-(2-((1H-1,2,3-triazol-5-yl)thio)ethyl)-2-fluoroaniline (9):**

To a stirred solution of 2-chloro-N-(2-fluorophenyl)acetamide (50 mg, 0.27 mmol) in THF (5 mL) was added BH<sub>3</sub>.SMe<sub>3</sub> (0.25 mL, 2.67 mmol) at 0 °C and the reaction mixture was stirred for 18 h at room temperature. Quenched with MeOH (2.0 mL) and the reaction mixture was evaporated to give crude residue which was dissolved in EtOAc, washed with 1N HCl solution, organic layer dried over Na<sub>2</sub>SO<sub>4</sub>, and concentrated to give amine. To a crude amine (60 mg) in THF (2.0 mL) was added sodium 1H-1,2,3-triazole-5-thiolate (63 mg, 1.5eq) and TBAI (5 mg) and the reaction mixture was heated at 70 °C for 30 min. Solids were filtered off and the solute was evaporated to give crude product which was purified on silica-gel column chromatography to yield **9** (25 mg, 39%) as a white solid. <sup>1</sup>H NMR (500 MHz, CD<sub>3</sub>OD) δ 7.84 (s, 1H), 7.02 – 6.86 (m, 2H), 6.69 (td, *J* = 8.4, 1.5 Hz, 1H), 6.66 – 6.54 (m, 1H), 3.42 (t, *J* = 6.9 Hz, 2H), 3.11 (t, *J* = 6.9 Hz, 2H); <sup>13</sup>C NMR (125 MHz, CD<sub>3</sub>OD) δ 33.2, 42.6, 111.9, 111.9, 113.9, 114.0, 116.2, 116.3, 124.2, 124.3, 136.0, 136.1, 150.7, 152.6.

**2-((1H-1,2,4-triazol-3-yl)oxy)-N-phenylacetamide (10):** Compound **10** (21 mg, 16%) was synthesized by following general procedure A using 1H-1,2,4-triazol-3-ol, as a white solid. <sup>1</sup>H NMR (500 MHz, D<sub>2</sub>O) δ 9.32 (s, 1H), 8.90 (d, *J* = 8.0 Hz, 2H), 8.82 (d, *J* = 7.7 Hz, 2H), 8.64 (t, *J* = 7.5 Hz, 1H), 6.05 (s, 2H); <sup>13</sup>C NMR (125 MHz, D<sub>2</sub>O) δ 45.8, 122.4, 126.8, 130.5, 138.2, 140.7, 157.0, 167.7.

**2-((1H-1,2,4-triazol-3-yl)amino)-N-phenylacetamide (11):** Compound **11** (15 mg, 23%) was synthesized by following general procedure A using 1H-1,2,4-triazol-3-amine, as a white solid. <sup>1</sup>H

NMR (500 MHz, D<sub>2</sub>O)  $\delta$  7.73 -7.72 (m, 2H), 7.70 (s, 1H), 7.43 (t,  $J$  = 7.6 Hz, 2H), 7.33 – 7.10 (m, 1H), 4.98 (s, 2H); <sup>13</sup>C NMR (125 MHz, D<sub>2</sub>O)  $\delta$  122.9, 127.5, 131.7, 140.1, 151.3, 158.8, 168.3.

**Scheme 2: Synthesis of 12**

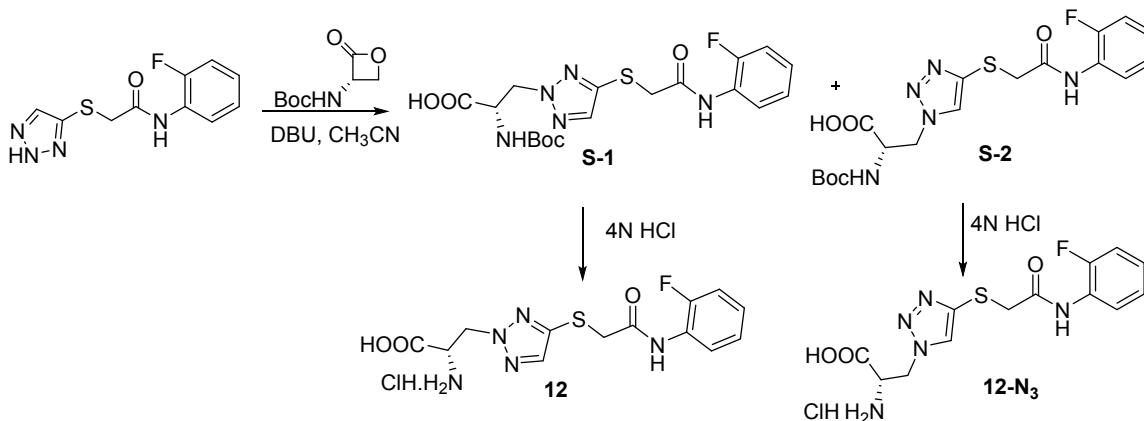

**(S)-2-((tert-butoxycarbonyl)amino)-3-(4-((2-((2-fluorophenyl)amino)-2-oxoethylthio)-2H-1,2,3-triazol-2-yl)propanoic acid (S-1) and (S)-2-((tert-butoxycarbonyl)amino)-3-(4-((2-((2-fluorophenyl)amino)-2-oxoethylthio)-1H-1,2,3-triazol-1-yl)propanoic acid (S-2):** To a stirred solution of **1** (100 mg, 0.40 mmol) L-serine- $\beta$ -lactone<sup>4,5</sup> (223 mg, 1.19 mmol) in CH<sub>3</sub>CN (2.0 mL) was added DBU (0.059 mL, 0.40 mmol) at room temperature for 1h. Quenched with water and neutralized with 1N HCl, extracted with EtOAc (3 X 10 mL), dried over Na<sub>2</sub>SO<sub>4</sub>, and concentrated under high vacuum to give crude products. Purification on silica-gel column chromatography yielded pure products **S-1** (30 mg, 17%) and **S-2** (45 mg, 26%) as a colorless oil. Regio chemistry of isomers was confirmed from HMBC correlation experiment.

**S-1:** <sup>1</sup>H NMR (500 MHz, CD<sub>3</sub>CN)  $\delta$  8.15 – 7.98 (m, 1H), 7.68 (s, 1H), 7.38 – 6.86 (m, 3H), 5.73 (dd,  $J$  = 14.1, 8.4 Hz, 1H), 5.02 – 4.62 (m, 3H), 3.79 (s, 2H), 1.38 (s, 9H); <sup>13</sup>C NMR (126 MHz, CD<sub>3</sub>CN)  $\delta$  170.9, 167.8, 155.4 (d,  $J$  = 81.0 Hz), 141.6, 136.2, 126.0 (d,  $J$  = 7.7 Hz), 123.7, 115.8 (d,  $J$  = 19.4 Hz), 80.1, 56.0, 53.8, 38.7, 28.0.

**S-2:** <sup>1</sup>H NMR (500 MHz, CD<sub>3</sub>OD)  $\delta$  8.00 (s, 1H), 7.96 – 7.84 (m, 1H), 7.26 – 7.03 (m, 3H), 4.88 (dd,  $J$  = 14.0, 4.4 Hz, 1H), 4.74 – 4.60 (m, 2H), 3.77 (s, 2H), 1.39 (s, 9H); <sup>13</sup>C NMR (125 MHz, CD<sub>3</sub>OD)  $\delta$  172.76, 170.40, 157.62 (d,  $J$  = 109.8 Hz), 155.23, 140.44, 129.88, 127.81 (d,  $J$  = 7.7 Hz), 126.08 (dd,  $J$  = 26.8, 2.6 Hz), 117.19 (d,  $J$  = 19.7 Hz), 81.73, 55.61, 52.85, 40.76, 29.38.

**(S)-2-amino-3-(4-((2-((2-fluorophenyl)amino)-2-oxoethylthio)-2H-1,2,3-triazol-2-yl)propanoic acid hydrochloride (12):** A solution of **S-1** (20 mg, 0.08 mmol) in 4N HCl in

dioxane (0.5 mL) was stirred for 1h at room temperature. Reaction mixture was evaporated and washed with EtOAc to give pure **12** (10 mg, 34%) as a white solid.  $^1\text{H}$  NMR (500 MHz,  $\text{D}_2\text{O}$ )  $\delta$  7.86 (s, 1H), 7.61 – 7.43 (m, 1H), 7.43 – 7.27 (m, 1H), 7.28 – 7.19 (m, 2H), 5.03 – 4.93 (m, 2H), 4.38 (ddd,  $J$  = 6.9, 4.5, 2.2 Hz, 1H), 3.86 (s, 2H);  $^{13}\text{C}$  NMR (126 MHz,  $\text{D}_2\text{O}$ )  $\delta$  170.6, 169.1, 155.3 (d,  $J$  = 246.3 Hz), 141.3, 137.7, 128.2 (d,  $J$  = 8.0 Hz), 126.0, 124.6 (d,  $J$  = 3.6 Hz), 116.0 (d,  $J$  = 19.6 Hz), 61.7, 53.4, 52.7, 37.6.

**(S)-2-amino-3-(4-((2-((2-fluorophenyl)amino)-2-oxoethyl)thio)-1H-1,2,3-triazol-1-**

**yl)propanoic acid hydrochloride (12-N<sub>3</sub>):** Compound **12-N<sub>3</sub>** (20 mg, 78%) was synthesized analogously as **12** from **S-2**, as a white solid.  $^1\text{H}$  NMR (500 MHz,  $\text{DMSO}-d_6$ )  $\delta$  9.98 (s, 1H), 8.26 (s, 1H), 7.89 (d,  $J$  = 2.0 Hz, 1H), 7.49 – 6.99 (m, 3H), 4.87 (d,  $J$  = 5.2 Hz, 2H), 4.52 (t,  $J$  = 4.8 Hz, 1H), 3.86 (s, 2H);  $^{13}\text{C}$  NMR (125 MHz,  $\text{DMSO}-d_6$ )  $\delta$  168.6, 167.6, 153.9 (d,  $J$  = 245.2 Hz), 138.9, 128.2, 126.1 (dd,  $J$  = 51.5, 9.5 Hz), 124.8 (d,  $J$  = 3.5 Hz), 124.4, 116.0 (d,  $J$  = 19.2 Hz), 52.3, 49.4, 38.7.

## Supplemental References

1. Zlitni, S.; Ferruccio, L. F.; Brown, E. D., Metabolic suppression identifies new antibacterial inhibitors under nutrient limitation. *Nat Chem Biol* **2013**, 9 (12), 796-804. DOI: 10.1038/nchembio.1361.
2. Krishnamoorthy, G.; Wolloscheck, D.; Weeks, J. W.; Croft, C.; Rybenkov, V. V.; Zgurskaya, H. I., Breaking the Permeability Barrier of Escherichia coli by Controlled Hyperporination of the Outer Membrane. *Antimicrob Agents Chemother* **2016**, 60 (12), 7372-7381. DOI: 10.1128/AAC.01882-16.
